# Supplementary material for: Efficient separation of large particles and giant cancer cells using an isosceles trapezoidal spiral microchannel
Source: Royal Society of Chemistry journal article supplement (doi:10.1039/d4an00750f), 2024-01-01
Supplement: d4an00750f1.pdf [file d4an00750f1.pdf]

1

## Supporting Information

### 2 **Efficient Separation of Large Particles and Giant Cancer Cells**

### 3 **Using an Isosceles Trapezoidal Spiral Microchannel**

4 Chanyong Park,<sup>a‡</sup> Wanyoung Lim,<sup>b‡</sup> Ryungeun Song,<sup>a</sup> Jeonghun Han,<sup>a</sup> Daeun You,<sup>c</sup> Sangmin  
5 Kim,<sup>d</sup> Jeong Eon Lee,<sup>c,e</sup> Danny van Noort,<sup>f</sup> Carl-Fredrik Mandenius,<sup>f</sup> Jinkee Lee,<sup>a,g</sup> Kyung-A  
6 Hyun,<sup>h</sup> Hyo-Il Jung,<sup>h</sup> and Sungsu Park<sup>a,b,g\*</sup>

7

8 <sup>a</sup> School of Mechanical Engineering, Sungkyunkwan University (SKKU), Suwon 16419, Korea

9 <sup>b</sup> Department of Biomedical Engineering, Sungkyunkwan University (SKKU), Suwon 16419,  
10 Korea

11 <sup>c</sup> Department of Health Sciences and Technology, Samsung Advanced Institute for Health Sciences  
12 & Technology (SAIHST), Sungkyunkwan University (SKKU), Seoul 06355, Korea

13 <sup>d</sup> Department of Breast Cancer Center, Samsung Medical Center, Sungkyunkwan University  
14 School of Medicine, Seoul 06351, Korea

15 <sup>e</sup> Division of Breast Surgery, Department of Surgery, Samsung Medical Center, Sungkyunkwan  
16 University School of Medicine, Seoul 06351, Korea

17 <sup>f</sup> Division of Biophysics and Bioengineering, Department of Physics, Chemistry and Biology  
18 (IFM), Linköping University, Linköping 58183, Sweden

19 <sup>g</sup> Department of Biophysics, Institute of Quantum Biophysics (IQB), Sungkyunkwan University  
20 (SKKU), Suwon 16419, Korea

21 <sup>h</sup> Department of Mechanical Engineering, Yonsei University, Seoul 03722, Korea

22 †These authors contributed equally to this work

23 \*Corresponding author: S. Park. School of Mechanical Engineering, Sungkyunkwan University  
24 (SKKU), 2066 Seobu-ro, Jangan-gu, Suwon 16419, Korea/E-mail: nanopark@skku.edu/Tel: +82-  
25 31-290-7431/Fax: +82-31-290-5889

26

27

28

29

30

31

32

33

34

35

36

37

38

39

40

41

42

43 **Table S1 Primer sequences for qRT-PCR.**

| Gene name | 5'-3' primer sequences        |
|-----------|-------------------------------|
| IL-6      | GTACATCCTCGACGGCATCT (F)      |
|           | GTGCCTCTTTGCTGCTTTCA (R)      |
| CD133     | GCATTGGCATCTTCTATGGTT (F)     |
|           | CGCCTTGTCCCTGGTAGTGT (R)      |
| SOX2      | TTGCTGCCTCTTTAAGACTAGGA (F)   |
|           | CTGGGGCTCAAACCTTCTCTC (R)     |
| GAPDH     | AGGTGGTGAAGCAGGCGTCGGAGGG (F) |
|           | CAAAGTGGTCGTTGAGGG (R)        |

44

45

46

47

48

49

50

51

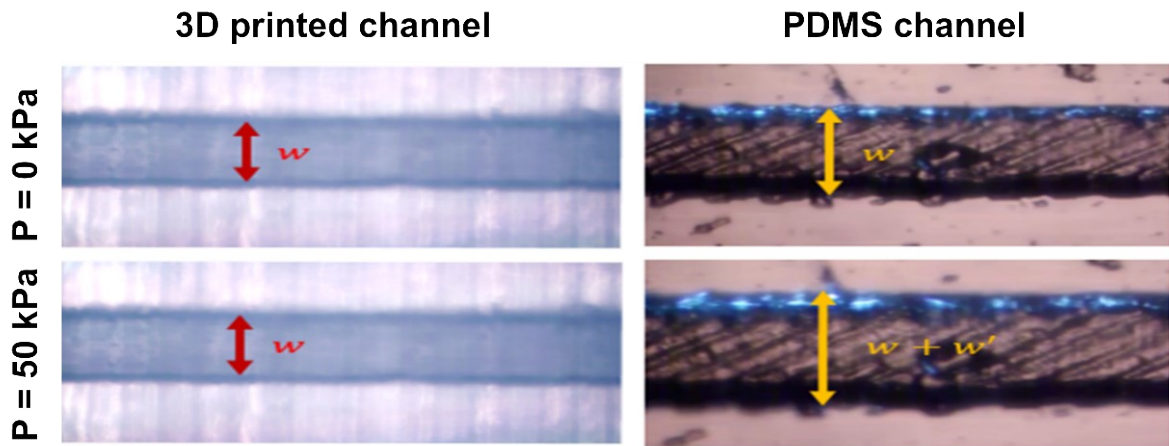

52

53 **Fig. S1** Comparison of deformation between the 3D printed spiral microchannels ( $S_{\mu}Cs$ ) and  
54 PDMS  $S_{\mu}Cs$ .  $w$ : 500  $\mu m$ .

55

56

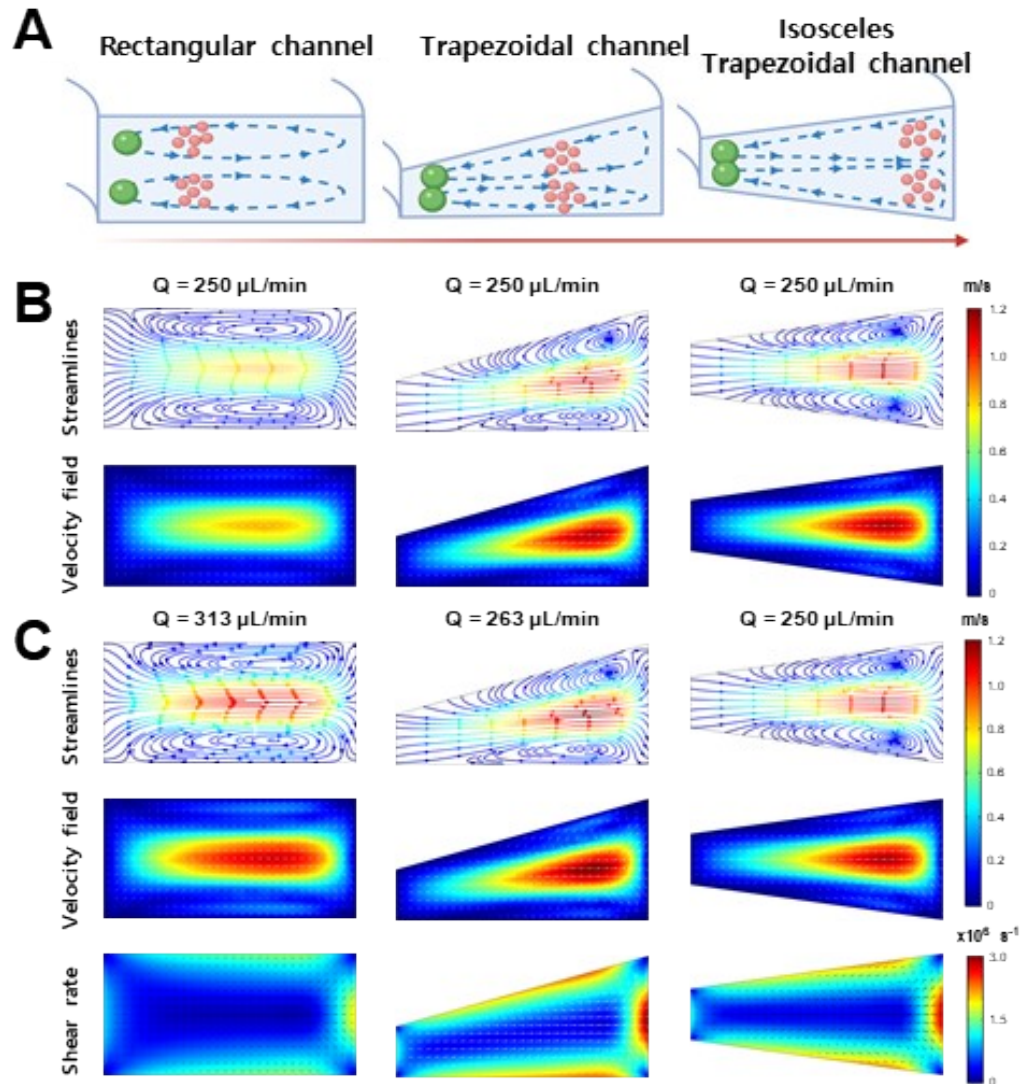

57

58 **Fig. S2** Numerical simulations were performed to compare the fluid flow and particle behavior in  
 59  $S\mu\text{Cs}$  with different cross-sectional shapes: rectangular, trapezoidal, and isosceles trapezoidal. (A)  
 60 Schematics describing the position of particles/cells with different size in the  $S\mu\text{Cs}$ . (B) Streamline  
 61 and velocity gradient inside the  $S\mu\text{Cs}$  with the same flow rate ( $Q = 250 \mu\text{L}/\text{min}$ ). (C) Streamline,  
 62 velocity gradient, and shear rate  $S\mu\text{Cs}$  at the same maximum velocity. Theoretical modeling of the  
 63 devices was performed by COMSOL MultiPhysics 5.4. The simulation environment was set up  
 64 for incompressible, laminar flows. The physical properties of water were (density  $\rho = 1,000 \text{ kg}/\text{m}^3$   
 65 and dynamic viscosity  $\mu = 10^{-3} \text{ kg}/\text{ms}$ ) applied to the simulation.

66

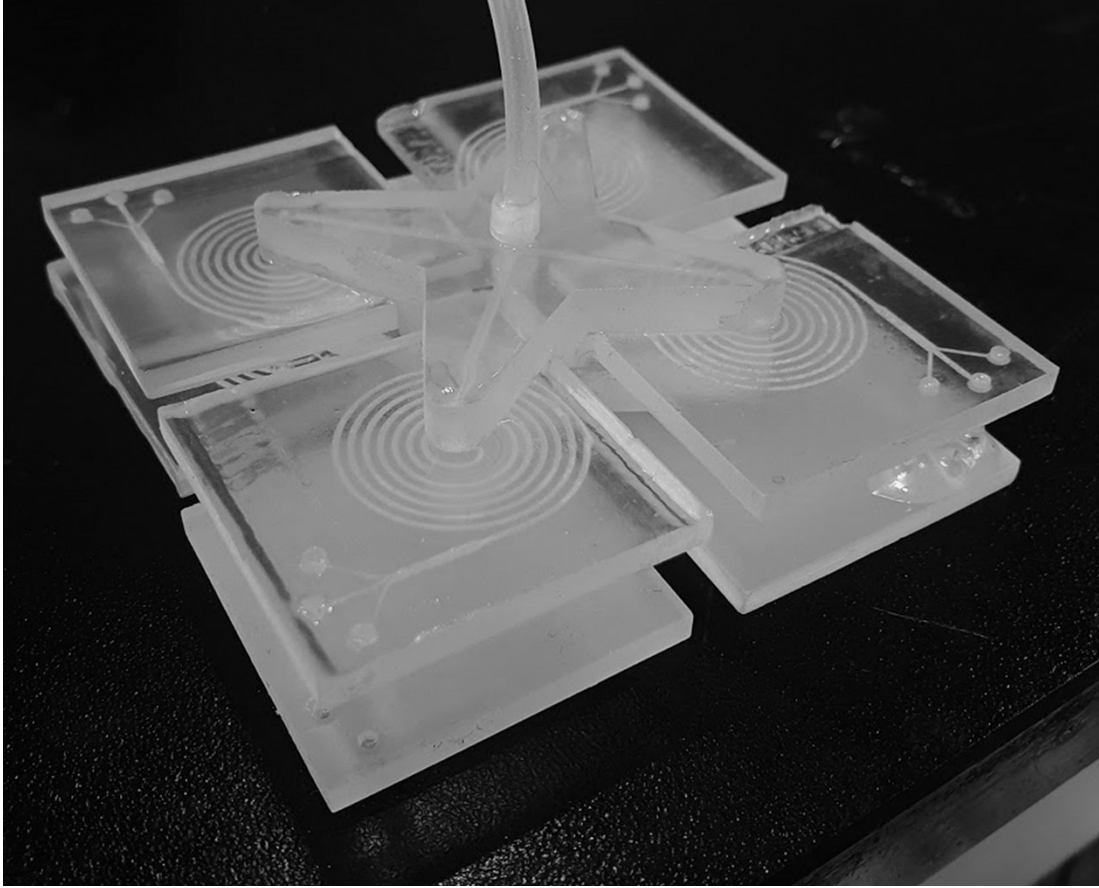

67

68 **Fig. S3** 3D Printed lego-like modular device by connecting ITS $\mu$ C.
